# Supplementary material for: The Temporal and Geographical Dynamics of Potato Virus Y Diversity in Russia
Source: MDPI journal article supplement (doi:10.3390/ijms241914833), 2023-10-02
Supplement: s1 [file s1]

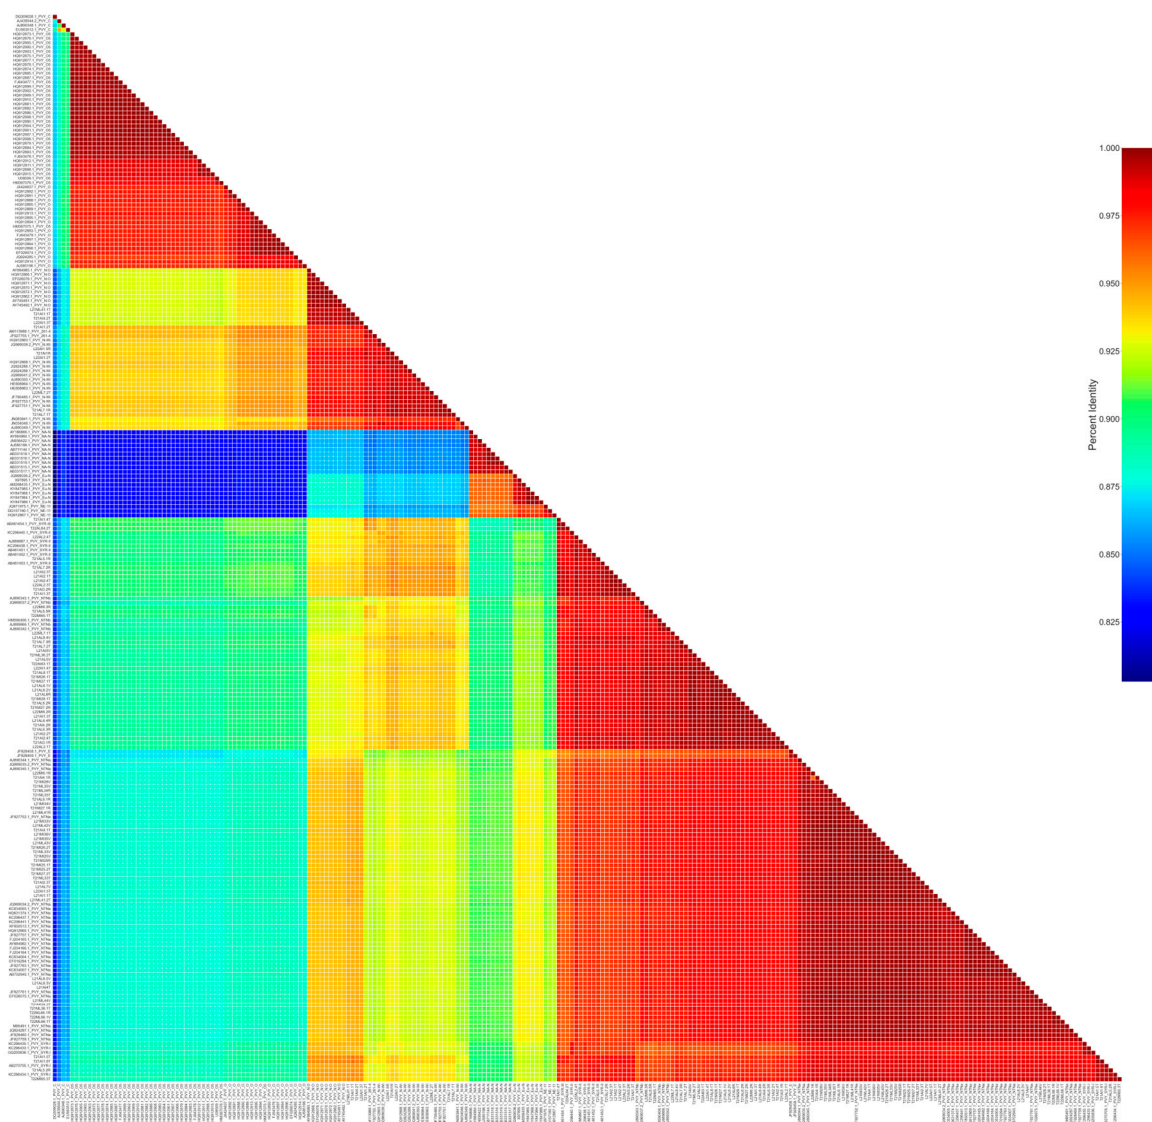

**Figure S1.** Color-coded pairwise identity matrix of the full-length PVY nucleotide sequences.

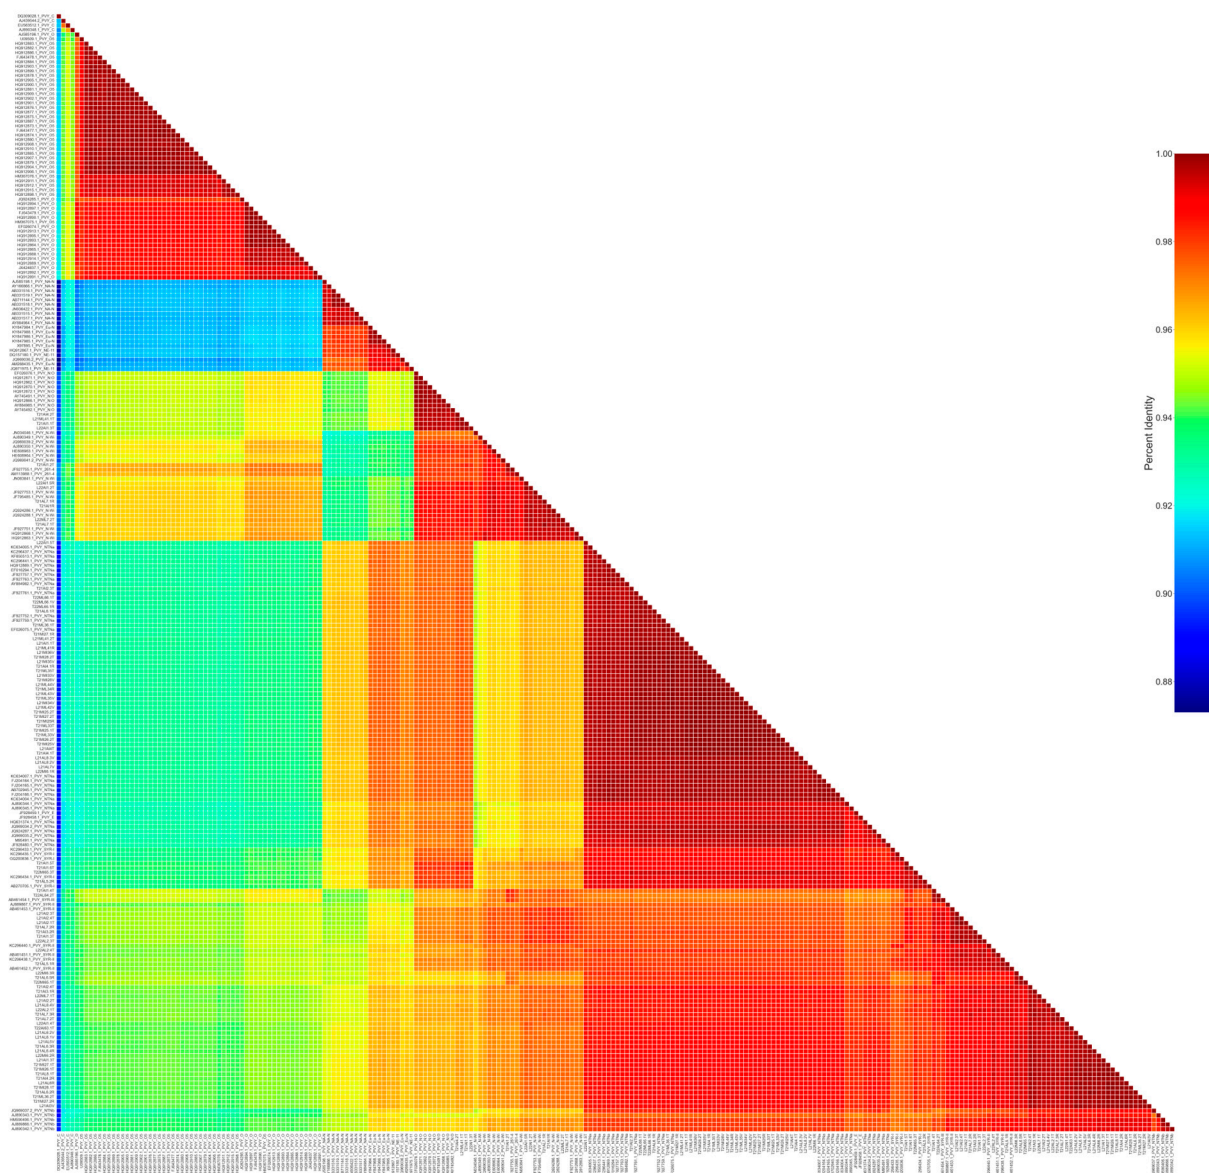

**Figure S2.** Color-coded pairwise identity matrix of the complete PVY polyprotein sequences.

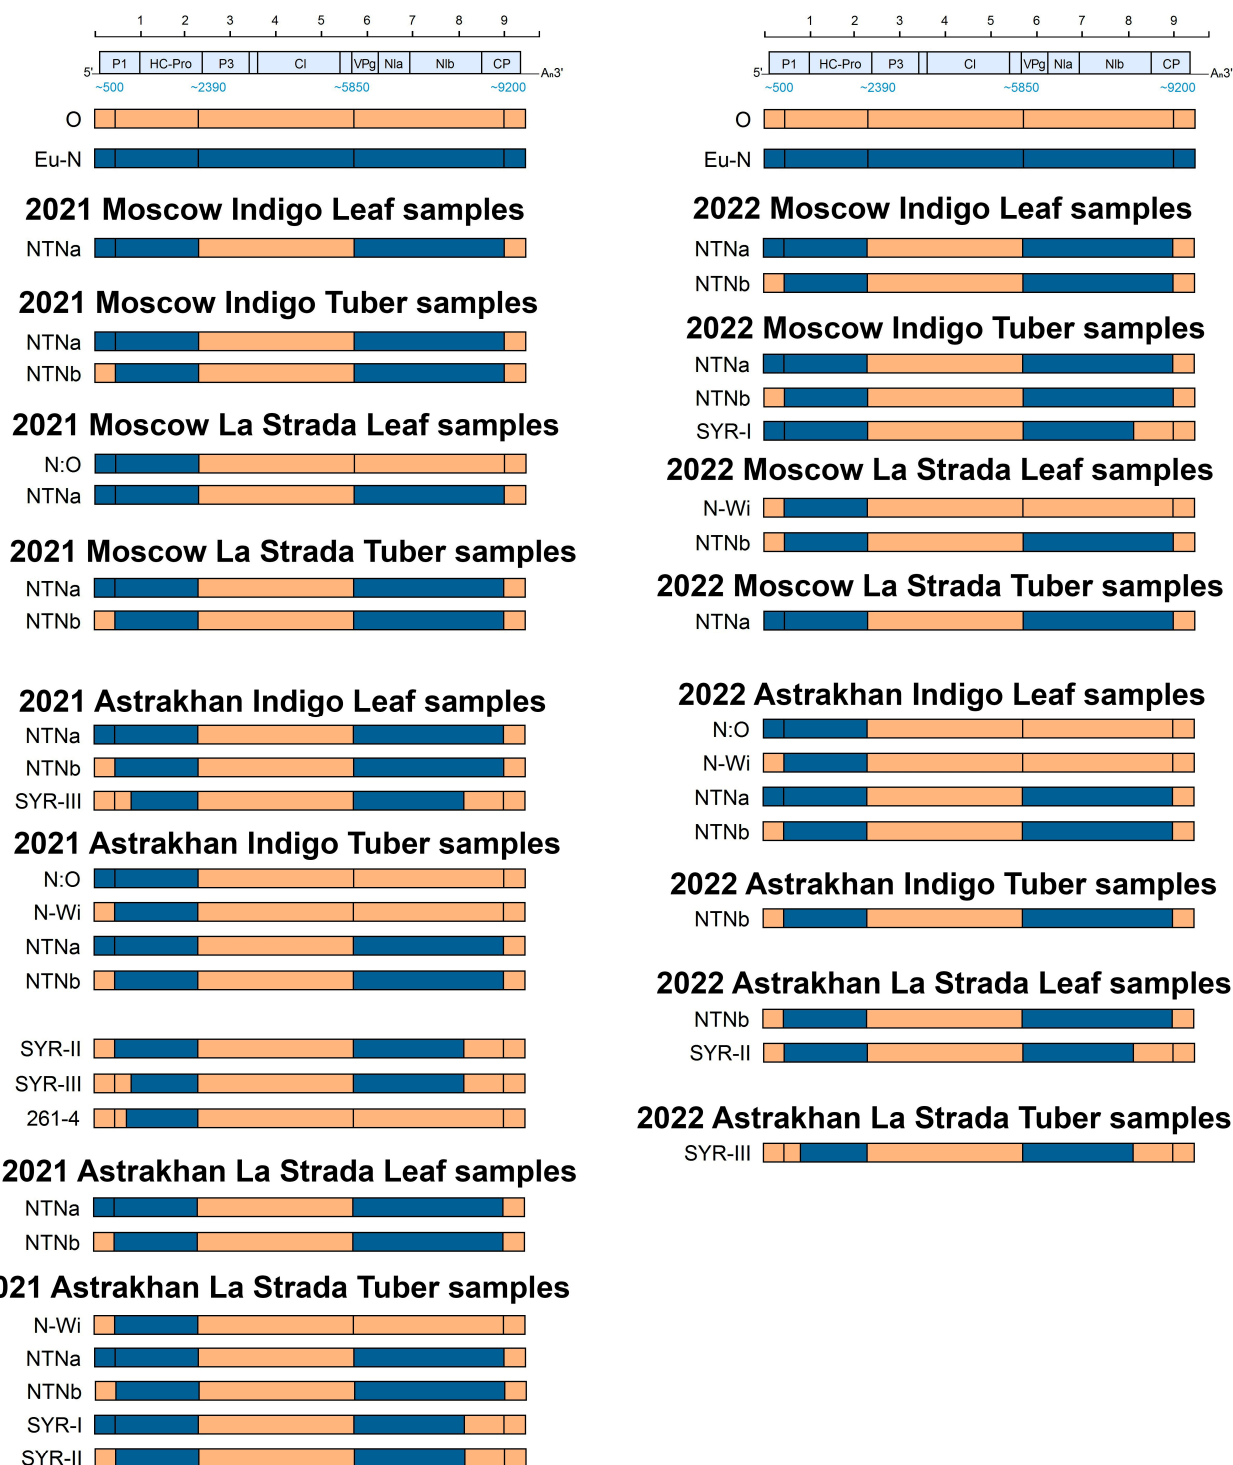

**Figure S3.** Schematic diagram of the known recombinant structures of potato virus Y (PVY) found in samples from the Moscow and Astrakhan regions, as well as five new recombinants described in this paper,
